# Supplementary material
Source: PubMed Central journal article supplement (PMC8492537)
Supplement: NIHMS1733317-supplement-1.pdf [file NIHMS1733317-supplement-1.pdf]

1 Supplemental Material:  
2  
3

| # | Transplant | Sex | Age | Donor CMV | Recipient CMV | Induction therapy | Valganciclovir duration | Recipient HLA type                              | Donor HLA type                                  |
|---|------------|-----|-----|-----------|---------------|-------------------|-------------------------|-------------------------------------------------|-------------------------------------------------|
| 1 | Heart      | F   | 66  | -         | +             | αIL-2R, steroid   | 3 months                | A*23:01 A*68:01<br>B*07:02 B*53:01<br>C*04 C*15 | A*02:01 A*25:01<br>B*08:01 B*51:01<br>C*07 C*14 |
| 2 | Heart      | M   | 58  | -         | +             | Steroid           | 3 months                | A*24:02 A*33:03<br>B*13:01 B*65:01<br>C*w6 C*w8 | A*24:02 A*02:01<br>B*44:01 B*62:01<br>C*w9 C*16 |
| 3 | Kidney     | M   | 68  | +         | +             | rATG, steroid     | 4 months                | A*01:01 A*02:01<br>B*07:02 B*08:01<br>C*07      | A*02:01<br>B*07:02 B*55:01<br>C*07 C*09         |
| 4 | Kidney     | M   | 50  | -         | +             | rATG, steroid     | 3 months                | A*02:01 A*68:01<br>B*18:01 B*35:01<br>C*04 C*10 | A*24:02<br>B*60:01 B*44:01<br>C*10 C*2          |
| 5 | Heart      | M   | 58  | +         | +             | αIL-2R, steroid   | 3 months                | A*01:01 A*02:01<br>B*18:01 B*35:01<br>C*02 C*04 | A*24:02 A*11:01<br>B*13:01 B*55:01<br>C*06 C*09 |
| 6 | Kidney     | M   | 41  | +         | +             | rATG, steroid     | 5 months                | A*30.02 A*33.03<br>B*72.01 B*45.01<br>C*w2 C*16 | A*33.03 A*74.01<br>B*72.01 B*35.01<br>C*w2 C*w4 |

4 **Table SI: Demographic and clinical information for each subject.** Donor and recipient serostatus were determined pre-transplant.  
5 None of these individuals had a prior transplant or episode of graft rejection or viremia during the study period. Note, while these  
6 subjects were also included in previously published analysis (17), the subject numbers are different in the two studies.

| TcRβ CDR3          | V         | J       | Sam-<br>ple | TcRβ CDR3         | V        | J       | Sam-<br>ple |
|--------------------|-----------|---------|-------------|-------------------|----------|---------|-------------|
| CSADRESGLDEQFF     | TRBV20-1  | TRBJ2-1 | 3 m0        | CAISEETPNTEAFF    | TRBV10-3 | TRBJ1-1 | M           |
| CSADRESGLDEQFF     | TRBV20-1  | TRBJ2-1 | 3 m12       | CAISESTPNTEAFF    | TRBV10-3 | TRBJ1-1 | M           |
| CSVEESGLAGNTGELFF  | TRBV29-01 | TRBJ2-2 | M           | CAISTDLPNTEAFF    | TRBV10-3 | TRBJ1-1 | M           |
| CSVEESGLAGNTGELFF  | TRBV29-1  | TRBJ2-2 | V           | CAITTDNPNTEAFF    | TRBV10-3 | TRBJ1-1 | M           |
| CASSPTGGLLINSPLHF  | TRBV27    | TRBJ1-6 | 6 m0        | CASQLTGAPNTEAFF   | TRBV6    | TRBJ1-1 | M           |
| CASSQDISGGLLSDTQYF | TRBV4-3   | TRBJ2-3 | M           | CASRDGTPNTEAFF    | TRBV6    | TRBJ1-1 | M           |
| CASSQDLAGGLLSDTQYF | TRBV4-3   | TRBJ2-3 | M           | CASSAATPNTEAFF    | TRBV6    | TRBJ1-1 | M           |
| CASSQDLAGGLLSYEYF  | TRBV4-3   | TRBJ2-7 | M           | CASSFNGPNTEAFF    | TRBV5-1  | TRBJ1-1 | V           |
| CASSSQGGLLDSPLHF   | TRBV6     | TRBJ1-6 | M           | CASSLGEPNTEAFF    | TRBV7-8  | TRBJ1-1 | M           |
| CASSTPIGGLLDNEQFF  | TRBV6     | TRBJ2-1 | M           | CASSPGTPNTEAFF    | TRBV7-8  | TRBJ1-1 | M           |
| CASSQDITSGGLLSYEYF | TRBV4-3   | TRBJ2-7 | 3 m0        | CASSQATPNTEAFF    | TRBV6    | TRBJ1-1 | M           |
| CASQPGQKNTEAFF     | TRBV6     | TRBJ1-1 | M           | CASSQGPNTAEFF     | TRBV7-6  | TRBJ1-1 | 2 m0        |
| CASSLVPGQKYNPLHF   | TRBV7-8   | TRBJ1-6 | M           | CASSSAHPNTEAFF    | TRBV28   | TRBJ1-1 | M           |
| CASSQEGQKNEKLFF    | TRBV4-3   | TRBJ1-4 | M           | CASSSAQPNTEAFF    | TRBV6    | TRBJ1-1 | M           |
| CASMTGQKNSPLHF     | TRBV6     | TRBJ1-6 | M           | CASSSGQPNTEAFF    | TRBV7-8  | TRBJ1-1 | M           |
| CASSAPGQKTGNTIYF   | TRBV7-6   | TRBJ1-3 | 3 m0        | CASSSPEPNTEAFF    | TRBV6    | TRBJ1-1 | M           |
| CASSGGQKNEKLFF     | TRBV6     | TRBJ1-4 | M           | CASSTATPNTEAFF    | TRBV6    | TRBJ1-1 | M           |
| CASSLQKNTAEFF      | TRBV28    | TRBJ1-1 | M           | CASSTGHPNTEAFF    | TRBV7-8  | TRBJ1-1 | M           |
| CASSMGQKNQPQHF     | TRBV6     | TRBJ1-5 | M           | CASSTTVTRPNTEAFF  | TRBV7-2  | TRBJ1-1 | 4 m3        |
| CASSSGQKNEKLFF     | TRBV6     | TRBJ1-4 | M           | CASSYEFPNTEAFF    | TRBV6    | TRBJ1-1 | M           |
| CASSSGQKNTAEFF     | TRBV6     | TRBJ1-1 | M           | CASTDDRPNTEAFF    | TRBV12   | TRBJ1-1 | M           |
| CASSTGQKNEKLFF     | TRBV6     | TRBJ1-4 | M           | CATSTENLGSPNTEAFF | TRBV15   | TRBJ1-1 | M           |
| CASSTGQKNQPQHF     | TRBV6-5   | TRBJ1-5 | 3 m0        | CASSLGGSYNEQFF    | TRBV27   | TRBJ2-1 | 4 m0        |
| CASSTGQKNQPQHF     | TRBV6-5   | TRBJ1-5 | 3 m3        | CASSQGGSYNEQFF    | TRBV27   | TRBJ2-1 | V           |
| CASSTGQKNTAEFF     | TRBV6     | TRBJ1-1 | M           | CASSDGPSTRPEYF    | TRBV2    | TRBJ2-7 | M           |
| CASTPGQKNTAEFF     | TRBV6     | TRBJ1-1 | M           | CASSDGPNEQYF      | TRBV11-3 | TRBJ2-7 | 5 m3        |
| CASTTGQKNTAEFF     | TRBV6     | TRBJ1-1 | M           | CASSLSDGPNEKLFF   | TRBV28   | TRBJ1-4 | 5 m12       |
| CATTSGQKNTAEFF     | TRBV6     | TRBJ1-1 | M           | CASSRLAGGTDYF     | TRBV7-3  | TRBJ2-3 | 4 m0        |
|                    |           |         |             | CASSRLAGSTDYF     | TRBV7-3  | TRBJ2-3 | M           |
|                    |           |         |             | CASSRLAGSTDYF     | TRBV7-3  | TRBJ2-3 | V           |
|                    |           |         |             | CASSWRGGDEYF      | TRBV7-2  | TRBJ2-7 | M           |
|                    |           |         |             | CSASWTGGDEYF      | TRBV20-1 | TRBJ2-7 | 4 m3        |
|                    |           |         |             | CSASWTGGDEYF      | TRBV20-1 | TRBJ2-7 | 4 m12       |

7 **Table SII: Motifs identified by GLIPH2 as shared with database TCRs.** GLIPH2 results for  
8 TCR motifs identified as shared between subjects in this study and IE-1 specific and responsive  
9 TCRs from VDJdb (V) and McPAS-TCR (M).  
10

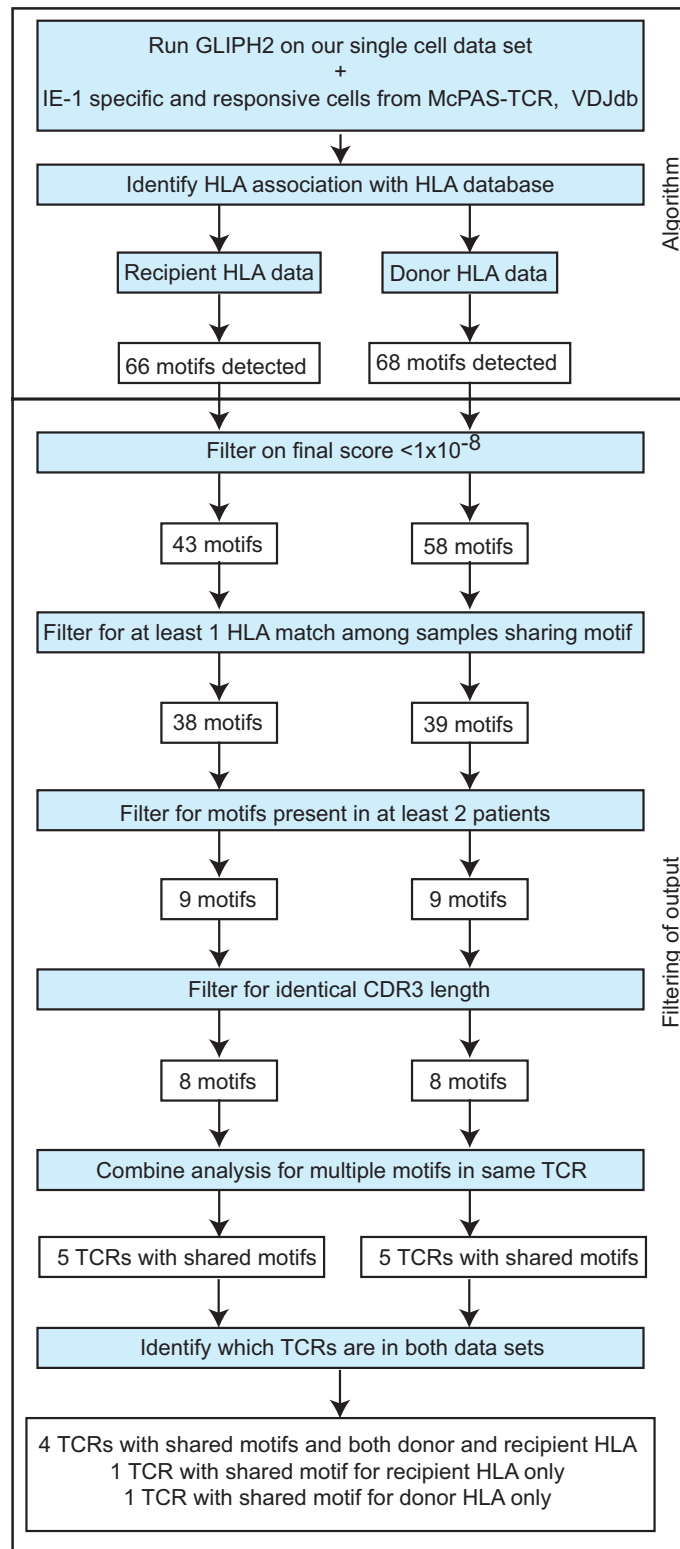

12

13 **Figure S1: Schematic of GLIPH2 workflow:** Steps completed by GLIPH2 algorithm (top) and

14 filtering of output (bottom). Blue boxes indicate steps and white boxes indicate motifs detected

15 after each step.
